# Supplementary material
Source: Research Square preprint supplement (doi:10.21203/rs.3.rs-9941847/v1)
Supplement: Supplementary file 1 [file 211f8ecff0dd133d6b107839.docx]

(a) Australia

(b) Ecuador

(c) Ghana

(d) Japan

(e) Sweden

(f) Tanzania

(g) Uzbekistan

**Extended Data Fig. 1.** Projected change in habitat area in (a) Australia, (b) Ecuador, (c) Ghana, (d) Japan, (e) Sweden, (f) Tanzania, and (g) Uzbekistan. Within the figure for each country, inset figures correspond with outcomes for all species and stressors (top row), different taxa and all stressors (middle row), and all taxa but different stressors (bottom row). The upper left figure for each country is plotted as the absolute change in habitat area across all species present in a given cell. All other figures for each country are plotted on a log2 scale, calculated as log2(habitat area 2050 / habitat area 2020), where habitat area is calculated for each cell and is the sum of available habitat for all species found in that cell. Borders shown in the plot indicate administrative level one political units of the country (i.e. states or equivalent) and are derived using the ne_states() function in the rnaturalearth V1.0.1 package in R.
