# Supplementary material
Source: Research Square preprint supplement (doi:10.21203/rs.3.rs-9941847/v1)
Supplement: Supplementary file 2 [file 598951f1a108ebb6cf042953.docx]

**Supplemental Materials For:**

The cumulative impact of multiple anthropogenic stressors to terrestrial biodiversity

**Supplemental Methods**

Glob2Loc calculates biodiversity outcomes for each habitat patch of each species, reporting outcomes for three biodiversity indicators: habitat area in square kilometers, population abundance of mature individuals, and habitat fragmentation and connectivity. The total analysis includes 25,821 species of terrestrial vertebrates.

All code required to run Glob2Loc is available online, and data inputs required to run Glob2Loc are available upon request. Data inputs and outputs are not provided online because of the size of the data (>5TB).

Glob2Loc requires three primary pieces of information to calculate biodiversity outcomes:

1. Where are species?
2. Where are human activities?
3. How do species respond to human activities?

These pieces of information are integrated to understand how each individual stressor, and combinations of interacting stressors, affect biodiversity at local to global scales.

Glob2Loc currently includes five anthropogenic stressors to biodiversity (agricultural expansion, separated into cropland and pastureland; agricultural intensification; urban expansion; climate change; and habitat fragmentation), has global coverage at a resolution of 2.25 km2, and includes 25,821 species of terrestrial vertebrates (3,397 amphibians; 9,691 birds; 4,597 mammals; and 8,136 reptiles).

The flowchart in Supplemental Fig. 1 provides a visual summary of the framework underpinning Glob2Loc. More detailed descriptions on the methods and data input used in each part of Glob2Loc is available below.

**Supplemental Fig. 1.** Flow chart showing the high-level linkages between the various inputs of Glob2Loc, the interactions between them, and the outputs. The data shown in the figure are from Salt’s dik-dik (*Madoqua saltiana*), with the exception of the map in the bottom right, which shows mammals in Sub-Saharan Africa.

**Where are species?**

The output of this step was a projection of where each species was, and where they were likely to be, at a spatial resolution of 1.5 x 1.5km, for each 5-year interval from 2020 to 2050. More information on this process is below.

Glob2Loc estimated where species currently were, and where they are projected to be, under future climate change. This part of Glob2Loc used an ensemble of species distribution models (SDMs), which is a commonly used approach to understand where a species’ climate suitable habitat is likely to be under different climate scenarios (e.g. see Newbold (2018)1).

The climate data used in this analysis is from the Coupled Modelled Intercomparison Project 6 (CMIP6) model ensemble2. Projections of the future climate were taken from the Shared Socioeconomic Pathway (SSP) 2 RCP 4.5 scenario, which is often viewed as a ‘business-as-usual’ climate change pathway.

The output from the SDM ensemble was an estimate of each species’ habitat range, at 5-year intervals to 2050. For each species, we estimated habitat range under two assumptions: (1) climate suitable habitat, which in the context of this analysis was any area identified as having a climate that can support that species, but that was limited to remain within the same realms and biomes in which the species currently exists; and (2) climate accessible habitat, which was the species’ climate suitable habitat but limited by that species’ capacity to access this habitat (i.e. due to the species’ capacity to shift their habitat range in response to climate change).

Supplemental Fig. 2 provides a visual flow chart of the process used to project habitat distributions for each species, going from data inputs (first column), building individual distribution models (second column), building an ensemble of distribution models (third column), to identifying a species estimated habitat (i.e. presence) under future climate change (fourth and final column).

The text after the figure provides a more detailed discussion on data inputs, methods, and accuracy of the SDMs.


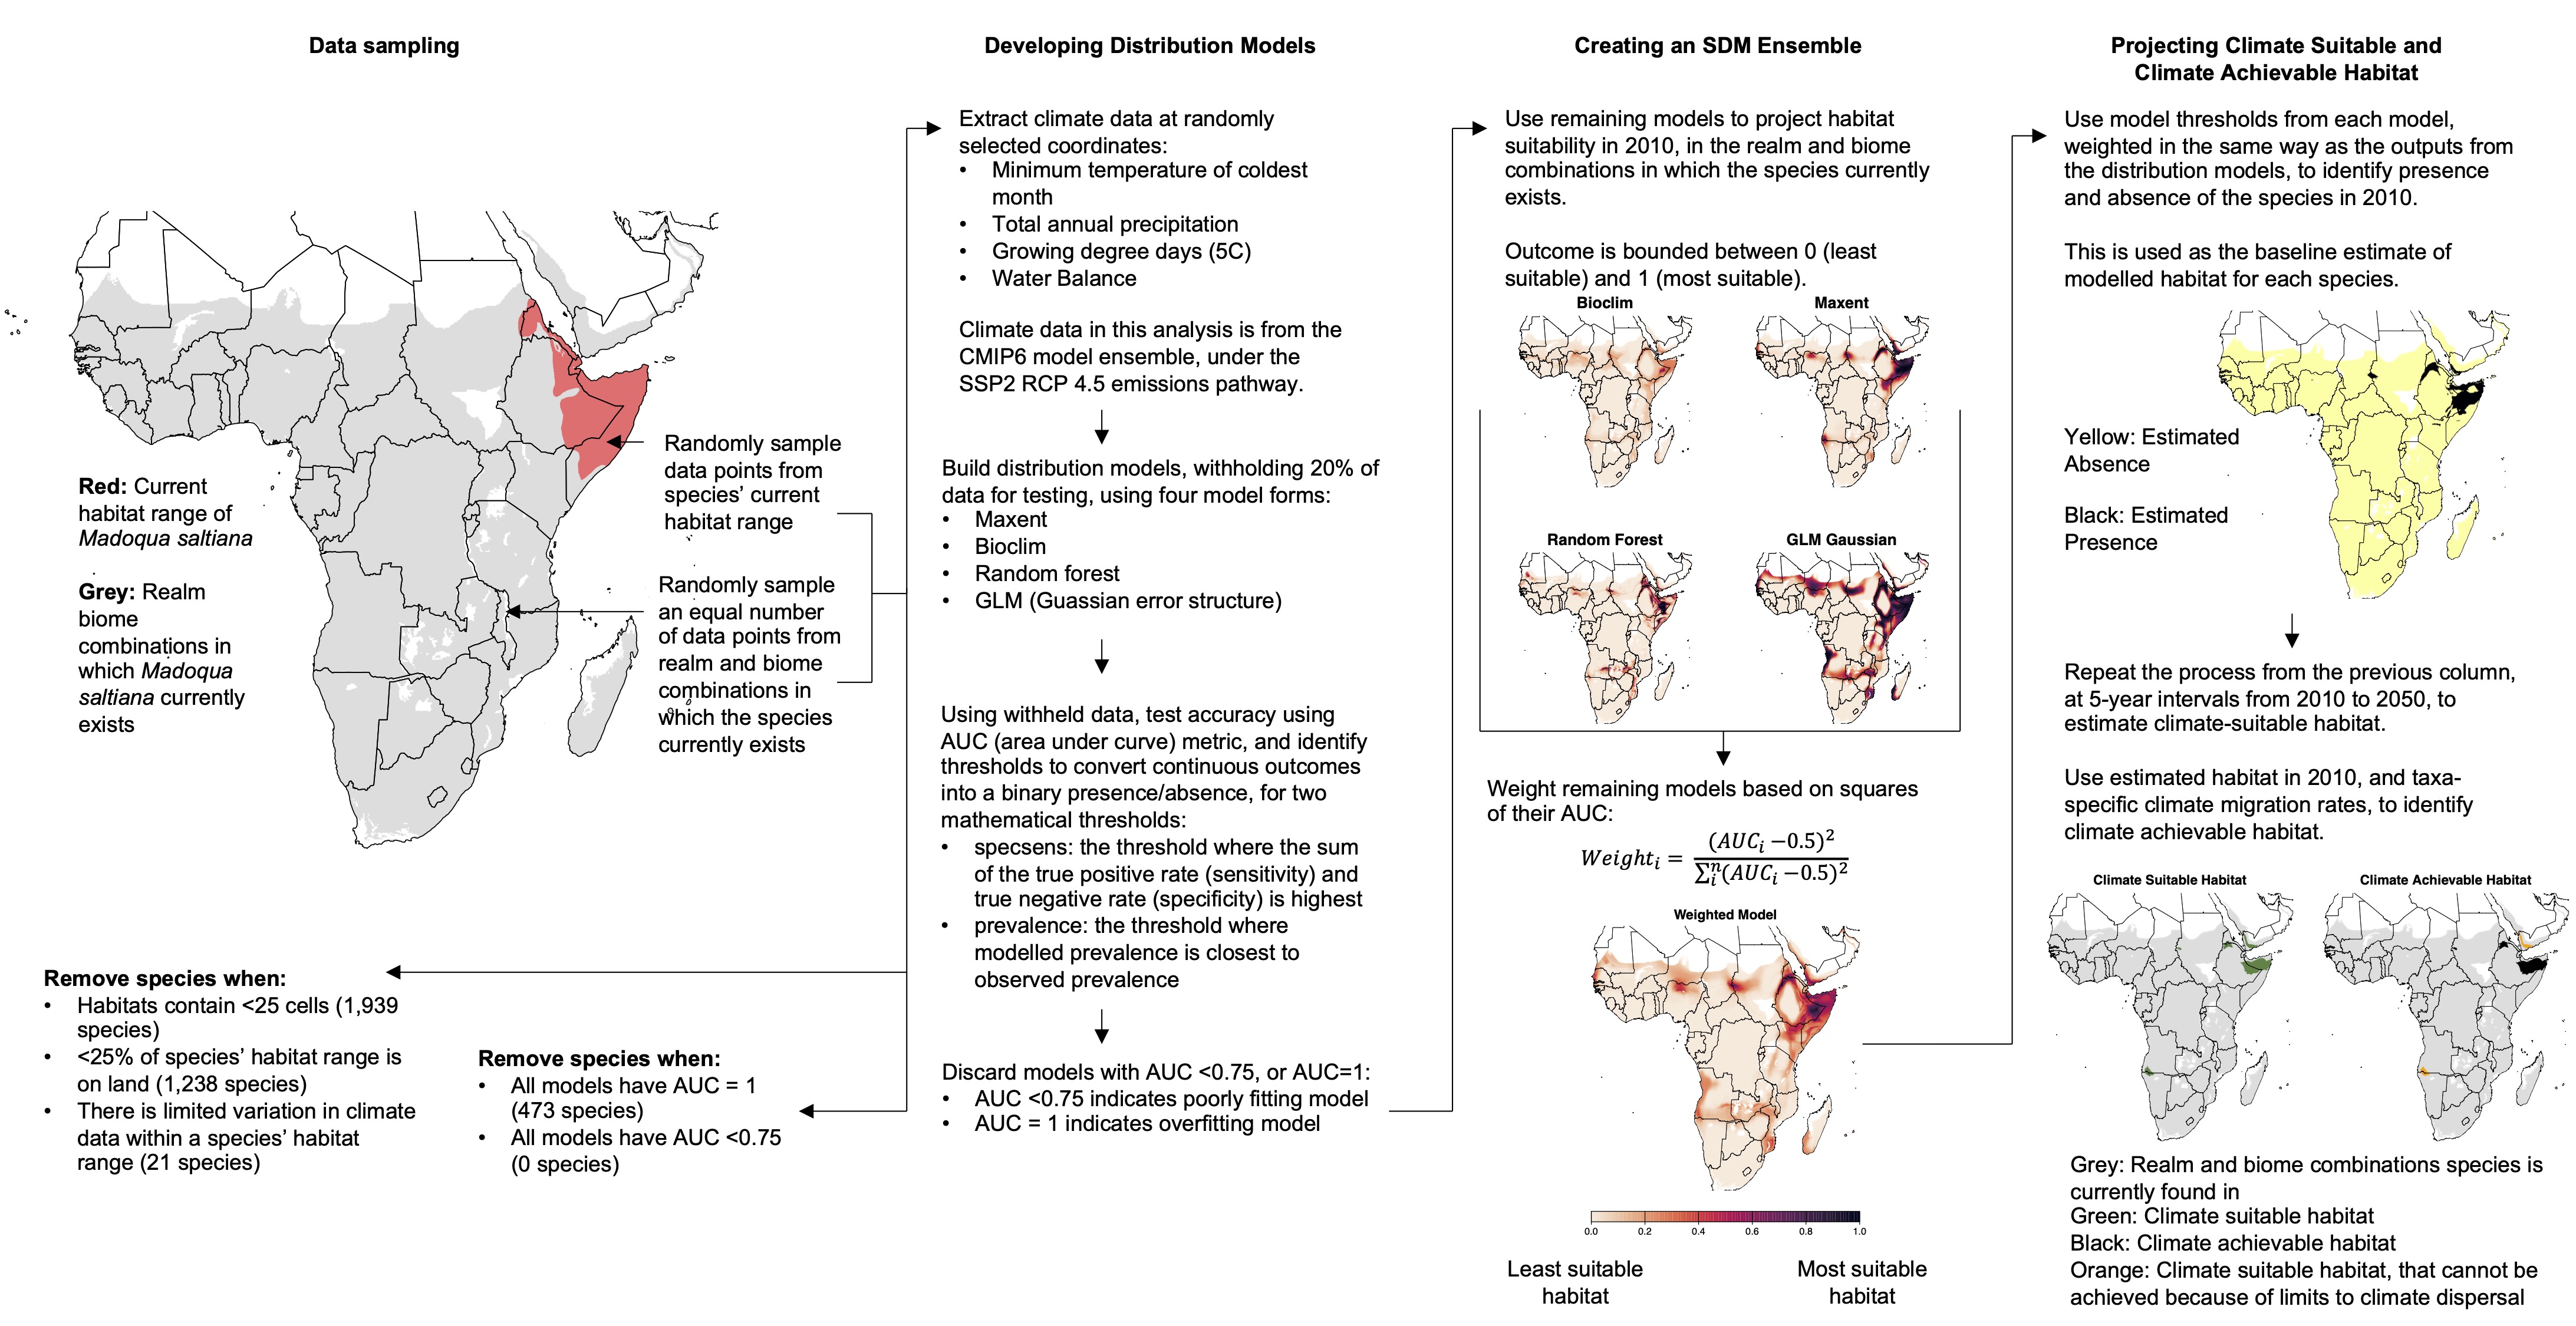


**Supplemental Fig. 2.** Flow chart depicting the process used to project the location of each species’ habitat in 5-year intervals to 2050, using Salt’s dik-dik (*Madoqua saltiana*) as an example.

*Building the SDM ensemble:*

SDMs are commonly used approach to understand the association between a species’ current habitat range and current climatic conditions. Once identified, these associations are then used to understand how the location of a habitat might change if climate conditions change.

To identify a species’ current habitat range, we used area of habitat maps for amphibians3, birds4, and mammals5, and IUCN habitat range maps for reptiles6. Area of habitat maps provide an approach to update IUCN habitat range maps based on species-specific characteristics, such as the species’ known habitat preferences and elevational tolerances3–5. We did not use area of habitat maps for reptiles because they were not available when we were developing the methodology, nor did we develop area of habitat because the information needed to do so was not available for most species of reptiles.

For building the SDMs, we used 2005 as a baseline year for both habitat range and climate data. In other words, we assumed that the area of habitat maps and the IUCN habitat range maps were indicative of species’ habitat ranges in 2005. We did this because of the slow rate at which IUCN updates habitat range maps for most species, and also because the area of habitat maps for amphibians, birds, and reptiles were originally published in 2015, 2011, and 2011, respectively 3–5.

The climate data used when develop and building the SDMs was from the SSP2 RCP4.5 model ensemble climate pathway from CMIP6. This same climate data was also used throughout the rest of this analysis.

To build the SDM ensemble, we followed methods from Newbold (2018)1. The SDM ensemble used in this analysis is underpinned by four SDMs that had different functional forms: a random forest classification model, a generalized linear model (glm), maxent (a climate envelope model), and bioclim (a type of machine learning approach built specifically for SDMs).

Below, we describe the process used build each SDM, and the SDM ensemble. This process corresponds with the first, second, and third columns in Supplemental Fig. 2.

For a given species, to build each individual SDM, we correlated a species’ current habitat range against four climatic variables: minimum temperature of the coldest month; total annual precipitation; growing degree days; and water balance. The random forest and glm models also included the squares of the above four climatic variables as co-variates in the model. These climatic variables were used because they correspond with different environmental and physiological limitations imposed on terrestrial vertebrates1.

When building each SDM, we sampled points in the following ways, which is also shown in the first and second columns of Supplemental Fig. 2:

- Randomly selected presence points within a species’ habitat range. The number of presence points was limited to <100,000 points due to processing capacity.
- Randomly selected an equivalent amount of absence points outside of the species' habitat range. In this analysis, absence points are defined as areas in the same realm and biome in which a species exists, but that are outside the species’ current habitat range. For this analysis, we used WWF definitions for realms and biomes7.
- Withheld 20% of the randomly selected presence and absence points when building each distribution model. This withheld data was used for cross-validation and testing accuracy of the distribution models.
- The same presence and absence points were used for all SDMs, and the same 20% of data was withheld for all SDMs. This ensures that differences in outcomes between SDMs are driven by differences between the SDMs, rather than differences between the data used to create each SDM.

We tested accuracy of each of the four SDMs by using the 20% of the data that was withheld from model development (second column of Supplemental Fig. 2). In this analysis, we assessed accuracy using the receiver operating characteristic curve (AUC-ROC). AUC-ROC is calculated as the area under the curve that correlates true positive rate against false positive rate. This approach provides an estimated accuracy from 0 to 1, where a value closer to 1 typically indicates a more accurate model.

At this stage, SDMs with poor performance, defined as having an AUC < 0.75 were discarded. Similarly, SDMs with an indication of overfitting, defined as having an AUC > 0.99 were also discarded, as this indicates they are likely to perform poorly when used to project a species’ habitat ranges under future climate conditions. The reasons for discarding models are discussed in more depth below.

For each remaining SDM (i.e. those with an AUC > 0.75 and < 0.99), we then projected climate suitability of all locations in the realm and biome in which the species is found, for each 5-year time period from 2005 to 2050. We did this by using the SDMs built with the process described above, but instead using projected climate data under the model ensemble CMIP6 SSP2 RCP4.5 pathway for each time period (i.e. 2010, 2015, 2020,…,2045, 2050). This is shown in the top half of the third column of Supplemental Fig. 3.

For each SDM, the outcome was a raster map containing values ranging from 0 to 1, where values closer to 1 indicated locations that contained more suitable climate for the species, and values closer to 0 indicated locations with less suitable climate for the species. This is shown with the four small maps in the top half of the third column of Supplemental Fig. 2.

We then combined the outputs from each individual SDM to create the SDM ensemble, as shown in the bottom half of the third column of Supplemental Fig. 2. This was done by weighting the outcomes across the individual SDMs, putting more weight SDMs that have higher accuracy, where accuracy was defined by the AUC ROC metric as noted above. This weighting was done using the following equation:

where: *i* indicates the individual SDM model form; AUC indicates the AUC metric; and Weighting SDM*i* indicates the weighting put on the individual SDM model.

The outcome of this process, for each 5-year period from 2005 to 2050, was a raster map containing values that ranged from 0 to 1, where values closer to 1 indicated locations with more suitable climate for the species, and values closer to 0 indicated locations with less suitable climate for the species. The bottom map in the third column of Supplemental Fig. 2 shows an example output of this output.

We then converted the continuous outputs from the model ensemble to define climate suitable habitat. This process is shown in the fourth and furthest to the right column of Supplemental Fig. 2. We did this by identifying the cutoff value between 0 and 1 that can be used to identify a ‘presence’ point (locations with values above the cutoff value) and an absence point (locations with value below the cutoff value). We did this two types of mathematical model thresholds: the ‘prevalence’ and ‘equal specificity and sensitivity’ thresholds. The ‘prevalence’ threshold was the point at which modeled prevalence (from the SDM ensemble) was closest to observed prevalence (from the habitat range map used as an input during model development). The ‘equal specificity and sensitivity’ threshold as the point at which sensitivity (number of presence predictions / total number of actual presence points) and specificity (number of absence predictions / total number of absence points) were equal to each other. These model thresholds were derived for each individual SDM for each species, and were then weighted across SDMs using the weighting approach described above. These thresholds were calculated using the dismo package in R (version 1.3-15)8.

The output of this process was an estimate of a species’ climate suitable habitat, as identified by either the ‘prevalence’ or the ‘equal specificity and sensitivity’ threshold, for each 5-year time period from 2005 to 2050. This climate suitable habitat did not account for a species’ capacity to migrate from its current habitat to climate suitable habitat, but is restricted to remain within the realms and biomes in which a species was currently found (as based on their IUCN range map for reptiles and area of habitat map for other taxa). In other words, the estimates of climate suitable habitats in this analysis assumed there were no limits to a species being able to access new habitat areas. They are therefore a likely upper bound of where a species might be found in the future.

We next identified a species’ climate accessible habitat. We did this by accounting for a species’ capacity to access climate suitable habitat, based on their capacity to migrate from their current habitat in response to climate change. Following Newbold (2018)1, we used taxa-specific rates of climate migration, assuming that birds and mammals could migrate from current habitat at a rate of 30km per decade, and that amphibians and reptiles could migrate at a rate of 7.5km per decade. We applied these migration rates iteratively, such that a species’ climate accessible habitat in 2050 was dependent on its climate accessible habitat in 2045, that a species’ climate accessible habitat in 2045 was dependent on its climate accessible habitat in 2040, and so on. Because this was done iteratively, this means that if a species had no climate accessible habitat in one time period (e.g. 2030), it would not have any climate accessible in any future time periods (e.g. 2035, 2040, 2045, or 2050). We assumed that geographical features such as rivers and mountain ranges did not alter a species’ capacity to migrate in response to climate change.

A visual example of the difference between climate suitable habitat and climate accessible habitat is shown in the bottom half of the fourth (and furthest right) column of Supplemental Fig. 2.

When building the SDM ensemble, we conducted checks to ensure there was adequate data size and data variability used to build each SDM and the overall ensemble. Species that did not pass all of these checks were removed from the analysis. These checks, and the number of species removed from the analysis because they did not pass these checks, are described below:

- Minimum sample size: we only developed SDMs for species with an observed habitat range that contained 25 or more cells that overlapped with terrestrial habitats. This removed 1,939 species from the analysis, including 363 amphibians, 169 birds, 382 mammals, 1,025 reptiles.
- Minimum climate variability: we only developed SDMs for species that had 25 or more unique climate observations in their habitat range. This removed 21 species from the analysis, including 1 amphibian; 7 birds; 1 mammal; and 12 reptiles.
- SDM accuracy: we only developed SDMs for species where at least one of the four SDM functional forms had a reported AUC between 0.75 and 0.99.
  - 0 species were removed from the analysis because all four SDM forms had AUC < 0.75.
  - 473 species were removed from the analysis, including 138 amphibians, 94 birds, 56 mammals, 185 reptiles, because all model forms had an AUC equal to 1.
- Terrestrial habitat: we only developed SDMs for species where at least 25% of their current habitat is on land (e.g. excluding sea-birds, seals, marine iguanas, etc). This removed 1,238 species from the analysis, including 187 amphibians, 376 birds, 131 mammals, and 544 reptiles)

After these model checks, there were 25,821 species remaining in the analysis, including 3,397 amphibians; 9,691 birds; 4,597 mammals; and 8,136 reptiles. For these species, each SDM functional form was used for the following number of species:

- Bioclim (24,393 species)
- Maxent (24,212 species)
- Random forest (22,004 species)
- GLM gaussian (24,709 species).

Across the species in the analysis:

- All four types of SDMs were used for 20,754 species
- Three types of SDMs were used for 2,494 species
- Two types of SDMs were used for 1,582 species
- One type of SDM was used for 1,452 species. For these species:
  - Bioclim was used for 827 species
  - GLM gaussian was used for 403 species
  - Maxent was used for 174 species
  - Random forest was used for 48 species

In the main text, when providing summary results across a large number of species (e.g. median outcomes for all reptiles, etc), we reported results using climate accessible habitat as identified by the ‘prevalence’ threshold. We used the prevalence threshold because it provided more accurate estimates of a species’ current habitat compared to the ‘equal specificity and sensitivity’ (see Supplemental Table 1 below). In the Supplemental Results, we also reported results using the ‘equal specificity and sensitivity’ threshold, and also results when using climate suitable habitat.

In the main text, when providing results and uncertainty at the species level (e.g. the number of species that have lost >50% of their remaining habitat), we reported results across both thresholds to acknowledge variation in outcomes between the ‘prevalence’ and ‘equal specificity and sensitivity’ thresholds.

In the Supplemental Data, we provided estimated outcomes for all species using both the ‘prevalence’ and ‘equal specificity and sensitivity’ thresholds, and also when using a species’ climate accessible habitat and climate suitable habitat.

*Testing Accuracy of the SDM ensemble:*

We tested accuracy of the ensemble models by comparing modelled in 2005 (from the SDM ensemble) against reported habitat in 2005 (from the area of habitat maps or IUCN range maps).

For this, we defined accuracy as the total number of accurate predictions divided by the total number of points within the realm and biome combination in which the species currently exists. We did this to assess capacity for the SDM ensemble to identify both presence and absence for each species.

Across the 25,821 species in the analysis, we find that mean accuracy of the SDM ensemble when using the 'prevalence’ threshold was 96.2% (97.8% median accuracy, standard deviation of 4.3%), with variation across taxa. When using the ‘equal specificity and sensitivity’ threshold, we find that mean accuracy was 95.9% (median accuracy of 97.3%, standard deviation of 4.2%). Supplemental Table 1 below shows variation in accuracy across taxa and model thresholds.

**Supplemental Table 1.** Overall accuracy for the species distribution model ensemble, by taxon, and by threshold type.

*Differences in Projected Habitat Between Individual Species Distribution Models*

Projected habitat area varies between the four types of SDMs used in this analysis. This section discusses differences in climate suitable habitat between the types of SDMs, with results shown in **Supplemental Table 2**.

Across SDM types and species, bioclim and the random forest model projected the largest declines in the amount of climate suitable habitat, with smaller declines from the GLM and maxent models. When comparing differences between the models, the GLM and maxent models estimated changes in climate suitable habitats that were approximately 1/3 to ¼ of those of the bioclim and random forest models.

In contrast, the GLM and maxent models were most like to project increases to suitable habitat by 2050, in total projecting increases in suitable habitat for 40.9% and 40.3% of species, respectively. The bioclim and random forest models were less likely to project increases to climate suitable habitat, in contrast projecting increases in climate suitable habitat for 17.9% and 22.8% of species in this analysis, respectively.

In 2050, there were 442 species (using the ‘equal specificity and sensitivity’ threshold) and 565 species (using the ‘prevalence’ threshold) estimated to have no remaining climate suitable habitat in either the SDM ensemble or in any of the individual SDMs used to develop the ensemble model for that species. For the ‘prevalence’ threshold, this included 92 species of amphibians, 85 birds, 33 mammals, and 355 reptiles. For the ‘equal specificity and sensitivity’ threshold, this included 67 species of amphibians, 67 birds, 23 mammals, and 285 reptiles.

When comparing the ‘prevalence’ and ‘equal specificity and sensitivity’ thresholds, we find that overall changes in climate suitable habitat were similar between the two thresholds. For the prevalence threshold, this included an 13.4% (36.1 – 4.7%, with the range indicating outcomes for the 75th percentile and 25th percentile across species) median decline in habitat area. For the ‘equal specificity and sensitivity’ threshold, and a 12.1% (33.0 – 5.4%) median decline in habitat area. These findings were consistent across taxa (**Supplemental Table 2**).

**Supplemental Table 2.** Projected changes to habitat area from 2020 to 2050, summarised by different SDM functional forms, different thresholds, and different assumptions on a species’ capacity to disperse into climate suitable habitat. The values in this table do not account for the capacity for a species to exist or persist in human-modified landscapes – i.e. they indicate the proportional change in habitat area if all cells in a species’ climate suitable habitat also consisted of suitable habitat for that species. Values indicate proportional changes in habitat area relative to the 2020 baseline.

**Where are human activities:**

The output of this step was a series of projections of the extent and location of cropland, pastureland, urban extent, and cropland intensity. These projections were developed at a spatial resolution of 1.5 x 1.5km, and for each 5-year time period from 2020 to 2050.

We projected the location and extent of human activities by adapting, harmonizing, and extended existing approaches. This includes Williams et al (2021)9 for agricultural expansion (both cropland and pastureland), Kehoe et al (2017)10 for agricultural intensity, and Huang et al (2019)11 for urban extent. Projections of climate change were derived from the model ensemble SSP2 RCP 4.5 pathway available from CMIP62 as discussed above.

The baseline landcover maps used in this analysis were the European Space Agency’s Climate Change Initiative’s (ESA CCI) land cover maps12. These maps provided time series data of land cover changes from 1992 to 2020, at annual intervals, for 22 land cover classes, at 300m x 300m spatial resolution, with global coverage.

When projecting all stressors, we used the SSP2 scenario, which is widely used as the ‘business as usual’ or ‘middle of the road’ scenario when projecting future trends in human development.

We discuss the approach used to project each stressor in more detail below.

***Urban Expansion:***

The output of this step were projections of urban extent and location, at a 1.5 x 1.5km resolution, for each 5-year interval from 2020 to 2050.Supplemental Fig. 3visualizes urban extent in 2020, in 2050, and the change from 2020 to 2050.

To incorporate urban expansion, we modified the approach developed by Huang et al (2019)11, under their SSP2 projections of urban land cover in 2050. They provided projections of urban extent in different world regions (approximately equivalent to continents), and the probability that a given cell would experience urban expansion from 2015 to 2050. They derived their estimates of urban extent in a region and probability of urban expansion in each cell using four pieces of information: (1) country-level rates of population growth, (2) country-level rates of rural to urban migration, (3) country-level rates of urban population densities, and (4) Zipf’s law of urban size distribution, which states that the number of cities exceeding a given population size is inversely proportional to that population size.

In their analysis, Huang et al (2019)11 provided two estimates or urban land cover change that were used in this analysis: first, a raster map that contained information on the probability that each 5x5km cell would experience urban expansion at some point from 2015 to 2050; and second, the total projected amount of urban expansion in each world region from 2015 to 2050, where world regions in Huang et al (2019) were approximately synonymous with geographic continents. For this analysis, we reprojected the maps provided by Huang et al (2019) to the 1.5 x 1.5 km resolution and global Mollweide projection used in this analysis.

We used the following approach to project urban land cover in the context of this analysis.

First, we assumed that urban land cover in 2015 was equivalent to reported urban land cover in 2015 as derived from ESA CCI land cover maps12. We did this to ensure harmonization and consistency with other land covers used in this analysis which were also based on the ESA CCI land cover maps (i.e. cropland and pastureland). This contrasts with the starting land cover maps used in Huang et al (2019)11, which were derived from the SSP scenarios.

Second, for each 5-year time period from 2015 to 2050, we allocated the projected region-level expansion to individual raster cells. We did this by assuming that: (a) the total amount of projected urban expansion from 2015 to 2050 within each region occurs linearly from 2015 to 2050 (e.g. there was the same amount of urban expansion from 2015 to 2020 as there is from 2045 to 2050); and (b) that urban expansion preferentially occurred in cells that contain larger amounts of current urban extent, and that were in closer proximity to other cells that contain urban areas (as measured by the sum of urban extent in the 8 immediately adjacent cells).

Third, we repeated the process described above for each 5-year time period, deriving projections of urban extent in each cell from 2015 to 2050.

In total, the above process resulted in projections where urban expansion predominantly occurred at the fringe of current urban areas. Supplemental Fig. 3shows urban extent in 2020 (left panel), projected urban extent in 2050 (centre panel), and projected change in urban extent from 2020 to 2050 (right panel).

**Supplemental Fig. 3.** Urban extent in 2020 (left) and 2050 (middle), and the change in urban extent from 2020 to 2050 (right). Figures show urban extent as a proportion of each cell.

***Agricultural Expansion:***

The output of this step were projections of the location of cropland and pastureland, at a resolution of 1.5 x 1.5km, for each 5-year interval from 2020 to 2050. We did this by extending methods developed in Williams et al (2021) to account for feedbacks from and interactions with climate change and urban expansion.9 Supplemental Fig. 4 shows projected cropland, pastureland, and agricultural extent in 2020, in 2050, and the change in extent in these land covers from 2020 to 2050.

Williams et al (2021)9 developed a two-step regression-based approach to allocate national-level projections of changes in agricultural land (measured in square kilometers) to individual 1.5 x 1.5km cells within a country. This regression-based approach was developed by identifying associations between historic satellite derived trends in agricultural land cover change (calculated from the ESA CCI dataset12) and known determinants of it (e.g. proximity to markets, suitability for crop production, location of protected areas, proximity to other agricultural lands, growing degree days, etc.). In this analysis, agriculture was divided into cropland and pastureland, whereas Williams et al (2021) did not separate cropland from pastureland.

The national-level projections of agricultural land cover (in square kilometers) used here are the business-as-usual projections from Willett et al (2019). These projections were drawn from a global agricultural model named IMPACT and then applied in the EAT-Lancet analysis13,14, and accounted for trends in population grown, consumer demand, international trade patterns, and crop yields.

The first step of the approach from was to estimate the probability that a given cell will experience a change in agricultural land cover. This was done by building a multinomial classification model, that identified the relative probability for a cell to experience an increase, decrease, or no change in agricultural extent based on known correlates of agricultural land cover change: including the suitability of an area for agricultural production15; current agricultural land cover from ESA CCI land cover12; trends in agricultural land cover in the previous 5 years (calculated from ESA CCI data12); proximity to other agricultural areas (i.e. density of agricultural landscapes, calculated as the sum of agricultural land cover in a cell and that 8 cells immediately around it, using ESA CCI data12), access to markets16, and the location of protected areas.17 The agricultural land cover data used in this analysis was from ESA CCI, with a baseline year of 2015, and with previous change in agricultural land cover calculated as the change from 2010 to 201512.

The second step of the approach from Williams et al (2021) was to estimate the amount of agricultural land cover change that a given cell is likely to experience9. This was done using two generalized linear models that examined (1) the proportion of a cell that is likely to undergo a transition from non-agricultural land to agricultural land (i.e. experience an increase in agricultural land cover), or (2) a transition from agricultural land to non-agricultural land (i.e. experience a decrease in agricultural land cover). These forecasts were bounded between 0 and 1 (for expansion), and 0 and -1 (for agricultural abandonment). When outputs from these models were used to estimate changes in agricultural extent in a given cell, they were limited by the amount of the cell that was not currently used for agriculture (when projecting increases in agricultural extent in the cell) or that was in agriculture (when projected decreases in agricultural extent in the cell). This was done to avoid the possibility of having a cell contain more than 100% agricultural land cover, or to have a cell contain negative amounts of agricultural land cover.

The multinomial and generalized linear models were developed independently for cropland and pastureland. In addition, separate multinomial models were developed for each of 12 world regions in the analysis, because the correlation between changes in agricultural land cover and the explanatory variables listed above differs across world region (see Williams et al 2021 for additional discussion). The world regions used in this analysis were the same as those used in Williams et al 20219, and were: Caribbean Islands; East Asia, Europe, Mesoamerica, North Africa, North America, North Asia, Oceania, South & South East Asia, South America, Sub-Saharan Africa, and West & Central Asia.

The third step of the approach was to apply the multinomial and generalized linear models described above, specifically to downscale national level projections of changes in agricultural area to individual cells within a country. This was done in three steps:

1. Select cells to experience a change in agricultural extent:
   1. If a country was projected to experience a net increase in cropland area, then randomly select cells to experience an increase in cropland extent based on their relative probability to experience an increase in cropland extent based on the output from the multinomial classification model.
   2. If a country was projected to experience a net decrease in cropland area, then randomly select cells to experience a decrease in agricultural extent based on their relatively probability to experience a decrease in cropland extent, as estimated by the multinomial model.
2. Estimate the amount of change in agricultural extent in the selected cells: For the cells that were expected to experience an increase (or decrease) in agricultural extent, estimate the amount of that cell that will increase (or decrease) in agricultural extent based on the generalized linear model.
3. Repeat steps (1) and (2) until the national-level target of change in cropland extent was met for that 5-year time period.

The fourth step was to repeat the above process across time periods, in each 5-year interval from 2010 to 2050. In other words, national-level projects of agricultural land cover extent from 2010 to 2015 are downscaled to each cell using the process above, to provide an estimate of agricultural extent in each cell in 2015. This map of agricultural extent in 2015 was then used as an input to project changes in agricultural extent from 2015 to 2020, with the 2020 map then used as in input to project changes from 2020 to 2025, and so on, up until 2050.

The fifth and final step was to repeat the above process a total of 25 times, with the agricultural land cover projection used in this analysis being the average across the 25 iterations. We did this because the process described above is probabilistic, based on randomly selected cells. We repeated this process 25 times because this was the number of iterations at which variation and uncertainty across iterations did not continue to decrease (Williams et al 2021)9.

In this approach, changes in cropland extent were allocated before changes in pastureland extent, with cropland potentially expanding into pastureland. In cases where cropland expanded into existing pasturelands, we assumed that an equivalent amount of pastureland (by area) was reallocated elsewhere in the same country, with the location of this displaced pastureland estimated using the process described above. Pastureland was not allowed to expand into cropland, and neither cropland nor pastureland was allowed to expand into urban areas. In addition, agricultural expansion was prevented from occurring into areas that were identified as being unsuitable for agricultural production (as deemed by FAO GAEZ15), such as deserts, urban environments, and tundra.

In the current analysis, we updated the approach from Williams et al (2021) in two ways: first, we incorporated interactions with and feedbacks from climate change; and second, we accounted for interactions with urban expansion based on the projections derived from Huang et al (2019)11.

To account for interactions and feedbacks between agriculture and climate change, we limited the future location of agriculture to remain within the range of growing degree days where agriculture is currently observed (using the 2.5th percentile and 97.5th percentile as lower and upper bounds, respectively). This allowed for agricultural expansion to occur in regions that are currently unsuitable for agricultural production but that are projected to become suitable by 2050, and prevented agricultural expansion from occurring in regions that are currently suitable for agricultural production but might become unsuitable by 2050.

We identified locations that were suitable for agriculture production, in each 5-year interval from 2020 to 2050, in four steps:

1. We overlapped maps current cropland in 2010 with a map of growing degree days in 2010 under a 5C threshold. Growing degree days were calculated using the growingDegDays() function in the R package envirem18. The calculations were based on average monthly temperature calculated by the CMIP6 model ensemble2.
2. We then identified the 2.5th percentile and 97.5th percentile of growing degree days in locations that currently have agricultural production based on the ESA CCI dataset12. These percentiles were weighted by the amount of agricultural extent in each cell.
3. We calculated growing degree days in each 5-year interval from 2020 to 2050, using the CMIP6 SSP2 RCP 4.5 projections of climate change used throughout this analysis.
4. We assumed that future agricultural production could only occur in:
   1. Cells with an estimated growing degree days between the current observed 2.5th to 97.5th percentiles (as identified above in step 2); or
   2. Cells that currently have agricultural production.

To account for feedbacks with urban expansion, we assumed that: (1) the location of urban areas changes in each 5-year interval as discussed previously; (2) expansion of urban extent into agricultural areas causes an equal amount of agricultural land (measured in area) to be reallocated elsewhere in the same country; (3) the location of this displaced agricultural land is estimated using the process described above that takes a national-level estimate of change in agricultural land and allocates this land; and (4) agriculture cannot expand into urban areas.

**Supplemental Fig. 4.** Cropland (top), pastureland (middle), and agricultural extent (bottom) extent, in 2020 (left) and 2050 (middle), or change in extent from 2020 to 2050 (right).

***Agricultural Intensification:***

We projected cropland intensity by dividing areas that contain cropland into three different levels of intensity – low intensity, moderate intensity, and high intensity – for each 5 year interval from 2020 to 2050, and for each cell that was projected to contain cropland.

We projected cropland intensity by adapting methods described in Kehoe et al (2017)10. This analysis used three levels of intensity (low intensity, moderate intensity, high intensity), with the different levels of intensity used to estimate the quality of agricultural landscapes for different species that are likely to exist or persist in croplands. We identify species as being able to exist or persist in croplands using the IUCN Level 2 Habitat Classifications6. More specifically, the IUCN Level 2 Habitat Classification lists habitat preferences for each species, and the quality of this habitat for that species. We identified species as being able to exist or persist in croplands if a species was listed as having cropland as either a ‘marginal’ or ‘suitable’ habitat for that species (see below; IUCN 20256). We did not project pastureland intensity due to limited data availability on how different types of species respond to pasturelands of different use intensities (see below).

Kehoe et al (2017)10 classified the intensity of croplands and pasturelands into low, moderate, and high land use based on agricultural inputs, the density of agricultural landscapes, the density of natural landcovers, and the type and density of livestock production systems (e.g. cattle, poultry, etc). This approach was developed using historic land cover and other data sets, with a baseline year of 2010.

To project agricultural intensity in this analysis, we developed a random forest classification model ensemble that correlated agricultural intensity in 2010 (as defined by Kehoe et al 201710) against two variables that are projected in this analysis: the ratio of crop yields relative to background rates of net primary productivity as defined in Dietrich et al (2012)19; and the density of agricultural landscapes, measured as the sum of agricultural extent in the eight context immediately adjacent cells and calculated from ECI CCI data in 2010 and 201512, or from the agricultural land cover projections from 2020 onwards. This model ensemble had an overall classification accuracy of 91.6% as shown in Supplemental Fig. 5, and is described in more detail below.

For crop yields, we used the ratio of human appropriated net primary productivity in agricultural lands relative to what net primary productivity would be in natural land covers (Dietrich et al 2012)19. This ratio changes in each 5-year time period, based on the projected country-level trends in crop yields that are used in this analysis, and that were used to project agricultural land cover in the EAT-Lancet analysis13,14. For example, if the ratio in 2010 was 1.5 (e.g. net primary productivity in croplands is 50% higher than net primary productivity in natural land cover), and crop yields were projected to double by 2050, the ratio in 2050 would become 3.0.

For density of agricultural landscapes, we defined density as the total amount of agricultural extent in a given cell, and the 8 immediately adjacent cells. This was calculated in each 5-year interval from 2010 to 2050, using projected extent and location of agricultural land. This calculation included both cropland and pastureland. The density of agricultural landscapes was calculated using ESA CCI data in 2010 and 201512, and the projections of agricultural land cover for 2020 to 2050.

To build the random forest classification model, we correlated 2010 cropland intensity reported in Kehoe et al (2017)10 against these two variables and their cross product. We used 5-fold cross validation, weighting the resultant five models based on the square of their relative accuracies to build the model ensemble. Each data partition contained a total of 2,014 – 2,016 data points, with 132 – 133 points corresponding with ‘High Intensity’ croplands, 966 – 967 points corresponding with ‘Moderate Intensity’ croplands, and 916 – 917 points corresponding with ‘Low Intensity’ croplands.

Across all cells, the random forest model ensemble had an overall accuracy of 91.6% (9,231 of 10,075 cells). It accurately predicted low intensity croplands at a rate of 94% (4,287 of 4,582), moderate intensity croplands at a rate of 91% (4,416 of 4,831), and high intensity landscapes at a rate of 80% (528 of 662; Supplemental Fig. 5).

We also tested the above approach, but using a multinomial classification model ensemble. The weighted multinomial model ensemble had a lower overall model accuracy (70.4%; 7,089 of 10,075), as well as lower accuracy for each land cover classification (low intensity: 75% accuracy; moderate intensity: 76% accuracy; high intensity: 0% accuracy). We did not use the multinomial model because of its lower overall accuracy compared to the random forest model, and because the multinomial model infrequently predicted high intensity croplands (1 prediction compared to 662 observations; Supplemental Fig. 5).

We therefore used the weighted random forest classification model ensemble to project cropland intensity, from 2020 to 2050. Supplemental Fig. 6 shows the spatial patterning of cropland intensity in 2020 to 2050, and **Supplemental Table 3** shows the number of cells projected to be of low, moderate, and high cropland intensity in 2020 and 2050.

**Supplemental Fig. 5.** Level plots visualising accuracy of the random forest and multinomial models used to classify cropland into low, moderate, and high use intensities.Plot shows the predicted crop use intensity (e.g. from the model) on the x-axis against the observed crop use intensity on the y-axis. The text in each tile indicates the number of actual, the number of predicted, and the accuracy of the predicted observations for each pairwise combination of actual and predicted use intensities. Colours indicate relative accuracy, such that dark blues indicate more accurate model predictions, and tans indicate less accurate model predictions. Perfectly accurate models would have dark blues tiles on a diagonal from the upper left to the lower right, with tans panels elsewhere. Top panel shows the accuracy of the random forest model ensemble used in this analysis. Bottom panel shows the accuracy of the multinomial model ensemble that was not used because of its lower overall accuracy and lack of capacity to predict high intensity croplands.

**Supplemental Fig. 6.** Projected agricultural intensity in 2020 (left), 2050 (middle), and change in agricultural intensity from 22020 to 2050 (right).

**Supplemental Table 3.** Projected changes in cropland intensity from 2020 to 2050, for cells that contain any amount of cropland in either 2020 or 2050. Values contained in the table indicate the number of cells with different intensities of cropland use, and not the total cropland area.

|  | No Cropland in 2050 | Low Intensity in 2050 | Moderate Intensity in 2050 | | High Intensity in 2050 | |
| --- | --- | --- | --- | --- | --- | --- |
| No Cropland in 2020 | 0 | 317690 | | 1454121 | | 16121 |
| Low Intensity in 2020 | 4443 | 6035018 | | 6951670 | | 21693 |
| Moderate Intensity in 2020 | 7472 | 205076 | | 16976609 | | 705819 |
| High Intensity in 2020 | 0 | 1377 | | 398454 | | 74436 |

**How do species respond to human activities:**

The third and final part of Glob2Loc was to assess how different species respond to different anthroprogenic stressors (and combinations of them) that occur in their habitat range. The outcome of this process was, for each 5-year interval from 2020 to 2050, three estimated biodiversity outcomes:

1. Habitat area, measured in square km.
2. Population abundance, measured in number of mature breeding individuals.
3. Spatial patterning of a species’ habitat range, measured in the number of habitat patches and populations in the species’ habitat range.

These outcomes were calculated in each cell of each species’ habitat range, in five general steps that are listed below:

1. Identify the overlap between a species’ habitat range and different human activities (cropland, pastureland, and urban areas in this analysis).
2. Calculate the remaining habitat area for the species, after accounting for that species’ habitat preferences.
3. Calculate the quality of human-modified landscapes that the species can exist in.
4. Estimate population density in each cell of a species’ remaining habitat, accounting for both available habitat in that cell and the quality of that habitat.
5. Identify habitat patches (groups of contiguous cells) and populations (groups of habitat patches that are within a species’ estimated capacity to disperse between habitat patches in human-modified landscapes) in the species’ remaining habitat.

These steps are described in detail below in the following section.

***1. Identify the overlap between a species’ habitat range and different human activities:***

First, we identified the overlap between a species’ habitat range and human activities. We did this using the species’ projected habitat (from ‘Where Are Species’) and the projected location of human activities (from ‘Where Are Human Activities’).

The outcome of this step was, for each cell in a species’ projected habitat range, an estimate of the proportion of the cell that was in one of four different land cover types: cropland, pastureland, urban extent, and other land covers.

In the main text, we reported outcomes using the ‘prevalence’ threshold, using a species’ climate accessible habitat range. For sensitivity analyses, we also provided outcomes using the ‘equal specific sensitivity’ threshold under a species’ climate accessible habitat, and for both thresholds using a species’ climate suitable habitat. These outcomes are available in the Supplemental Results.

***2. Calculate the remaining habitat area for the species, after accounting for that species’ habitat preferences:***

Second, based on the overlap between a species’ habitat range and different human activities, we calculated the proportion of each cell that contains a habitat type that the species can exist or persist in.

We did this by removing land covers from the species’ habitat range that the species cannot exist in. In this analysis, we defined habitats that a species can exist in as those that are listed as being of ‘Suitable’ (i.e. the species regularly or frequently occurs in the habitat) or ‘Marginal’ (i.e. the species irregularly or infrequently occurs in the habitat) habitat importance for that species, as indicated in the IUCN Level 2 Habitat Classification Scheme6. This scheme provides a hierarchical approach to land cover classifications that increases in specificity, from Level 1 (e.g. Forests) to Level 2 (e.g. Boreal Forests). Information on suitable and marginal habitat land covers are provided on the IUCN Red List for each species.

For this analysis, we used the following IUCN Level 2 Habitat Classifications to identify whether species could exist in cropland, pastureland, or urban areas:

- Cropland: Habitats 14.1 (Artificial – Terrestrial: Arable Land) or 14.3 (Artificial – Terrestrial: Plantations).
- Pastureland: Habitat 14.2 (Artificial – Terrestrial: Pastureland).
- Urban Areas: Habitats 14.5 (Artificial – Terrestrial: Urban Areas) or 14.4 (Artificial – Terrestrial: Rural Gardens).

At this stage, we assumed a species did not lose any habitat area to human-modified habitats that were listed as being of ‘Suitable’ or 'Marginal’ quality for that species. In other words, we assumed a species is able to exist in a human modified habitat that the IUCN deems as being of ‘marginal’ or ‘suitable’ quality for that species, without any penalty to the area of habitat remaining for that species. When a human modified habitat is not listed as being of ‘Suitable’ or ‘Marginal’ quality for a species, we assumed that the species could not exist in that land cover, and instead removed that area from the species’ potential habitat range.

In this part of the analysis, we only removed land cover types that are formally modelled in Glob2Loc – i.e. cropland, pastureland, and urban areas. This means that we assumed all other land covers within a species’ habitat range are a natural land cover and therefore are usable by the species.

The outcome of this step was an estimate of, for each cell in a species climate accessible habitat, the proportion of that cell that the species could likely exist in, after accounting for that species’ tolerance to human-modified activities. This outcome is bounded between 0 (the cell contained no habitat the species could exist in) and 1 (the entire cell is composed of habitat the species could exist in).

***3.* Calculate the quality of human-modified landscapes that the species can exist in*:***

Third, we assessed the habitat quality of the human-modified habitats remaining in the species’ habitat range. The estimate of habitat quality used here is derived independently for each species, and for each type of human modified land cover types in this analysis (i.e. cropland, pastureland, urban areas) that the species could exist in.

We assessed the quality of human-modified habitats in a species’ habitat range by adapting from Sykes et al (2020)20. Sykes et al (2020) used a series of generalized additive models to understand how the population density of species with different traits varied in different types of human-modified land covers. They did this by correlating field observations of population abundance for 912 species in different land covers, against three types of rarity traits for that species:

- Relative population density, measured by the average number of mature individuals per sq km in the species’ habitat range.
- Relative habitat range, measured by the amount geographic area (in sq km) in the species’ habitat range.
- Relative habitat niche breadth, measured as the sum of the number of habitats that the IUCN lists as being of ‘Suitable’ quality for the species, plus 0.3 times the number of habitats of ‘Marginal’ quality for the species.

For each rarity trait, Sykes et al (2020)20 categorized each species as common or rare, where ‘common’ species were those with above the median value for that trait across all species (i.e. more dense population, larger habitat range, and larger habitat niche breadth), and ‘rare’ species are those with below the median value for that trait across all species in the analysis.

We extended the approach from Sykes et al (2020) in four ways:

First, we classified all 30,302 species of terrestrial vertebrates with area of habitat maps (for amphibians3, birds4, and mammals5) or IUCN range maps (for reptiles6) as common or rare, according to the taxonomy developed in Sykes et al (2020)20. This was in contrast to the 912 species in the original analysis20, where species were classified as ‘rare’ and ‘common’ when compared against the other 911 species in the original analysis.

Second, we did not include relative population density as a rarity trait, because this is indicative of a species’ evolutionary history and not its relative rarity.

Third, when classifying species as common or rare, we made these comparisons within each taxa. In other words, we identified the rarity of bird species by making comparisons against other birds. This contrasted to the original analysis20, which made comparisons across all taxa, where e.g. the rarity of birds was defined by comparing birds against amphibians, birds, mammals, and reptiles. We did this because different taxa respond to the same human activity in different ways, and defining rarity within each taxa will likely be more reflective of this. Using the above approach, for the 3,513 species used to develop the general additive models used in this analysis, we classified 2,217 species as ‘common’ for both traits; 631 species as 'common’ for range and ‘rare’ for habitat breadth; 306 species as ‘rare’ for habitat range and ‘common’ for habitat breadth; and 359 species as ‘rare’ for both traits. This was in contrast to the original analysis20, where half of the 912 species were classified as ‘common’ for each trait. This difference in the proportion of species classified as ‘common’ and ‘rare’ was likely because species observed at field sites will be, on average, more common (or less rare), than the average species in that taxon.

Fourth, we increased the amount of human-modified land covers in the analysis20, specifically to incorporate urban land cover, and also to separate cropland into ‘low’ and ‘moderate or high’ intensities. We incorporated urban land cover into the analysis to understand how urban areas affect the habitat quality of species that can exist in them. In addition, we separated cropland into different use intensities because a species’ response to cropland is often dependent on the density and intensity of that cropland21. For this analysis, we used two levels of cropland intensity: ‘low intensity’, and ‘moderate or high intensity’. We did not separate ‘moderate’ from ‘high’ intensity because all observations of species in high intensity croplands from the underlying PREDICTs22 database used in this analysis were Strigiformes (owls) found in the Palearctic realm, and because we did not think it was appropriate to extrapolate from a single type of bird to other species of birds or to other taxa (i.e. amphibians, mammals, and reptiles). We did not separate pastureland into different use intensities because the land cover data used in this analysis (from Kehoe et al (2017)10) did not differentiate pastureland into different use intensities.

In this analysis, we built four models estimating how a species’ population density varies in different types of human-modified land covers, with one model for each of the four potential combinations of rarity traits. In each model, the outcome variable was the log of the effort corrected relative population abundance (in modified habitats relative to natural habitats), with predictor variables of land use type and taxa (i.e. amphibians, birds, mammals, or reptiles). As in Sykes et al (2020)20, we controlled for study and study site, to reduce the potential influence of differences in sampling effort and sampling method between studies. We included four types of human-modified land covers in this analysis: low intensity cropland, moderate and high intensity cropland, pastureland, and urban areas. See Sykes et al (2020)20 for more information on effort corrected log abundance, which was an effort to control for sampling effort when estimating observed population densities at different field sites.

The outcome from these models was an estimate of how the population density of a species responded to different types of human modified land covers, relative to the species’ population density in natural land cover. These outcomes were bounded between 0 (suitable habitat for the species, but no observed population density) and > 1 (habitat density in human-modified land covers is higher than population densities in natural land covers), where a value of 1 indicated that population densities in natural land covers and human-modified land covers were identical. These outcomes are shown in Supplemental Fig. 7below, and indicated that:

- Species responded differently to different human modified land covers. In general, species had lower habitat densities in moderate or high intensity croplands than in low intensity croplands or in pasturelands.
- Species with different combinations of rarity traits responded in different ways to the same human modified land cover. For instance, species that were identified as ‘common’ for both relative habitat niche breadth and habitat range typically had higher estimated population densities in croplands (both low intensity croplands and moderate to high intensity croplands) compared to natural land covers (i.e. primary vegetation). In contrast, species that were classified as rare for the habitat niche breadth and habitat area traits typically had lower estimated population densities in cropland than in natural land covers.
- There was substantial variation in how species respond to human modified land covers, both within and across taxa.


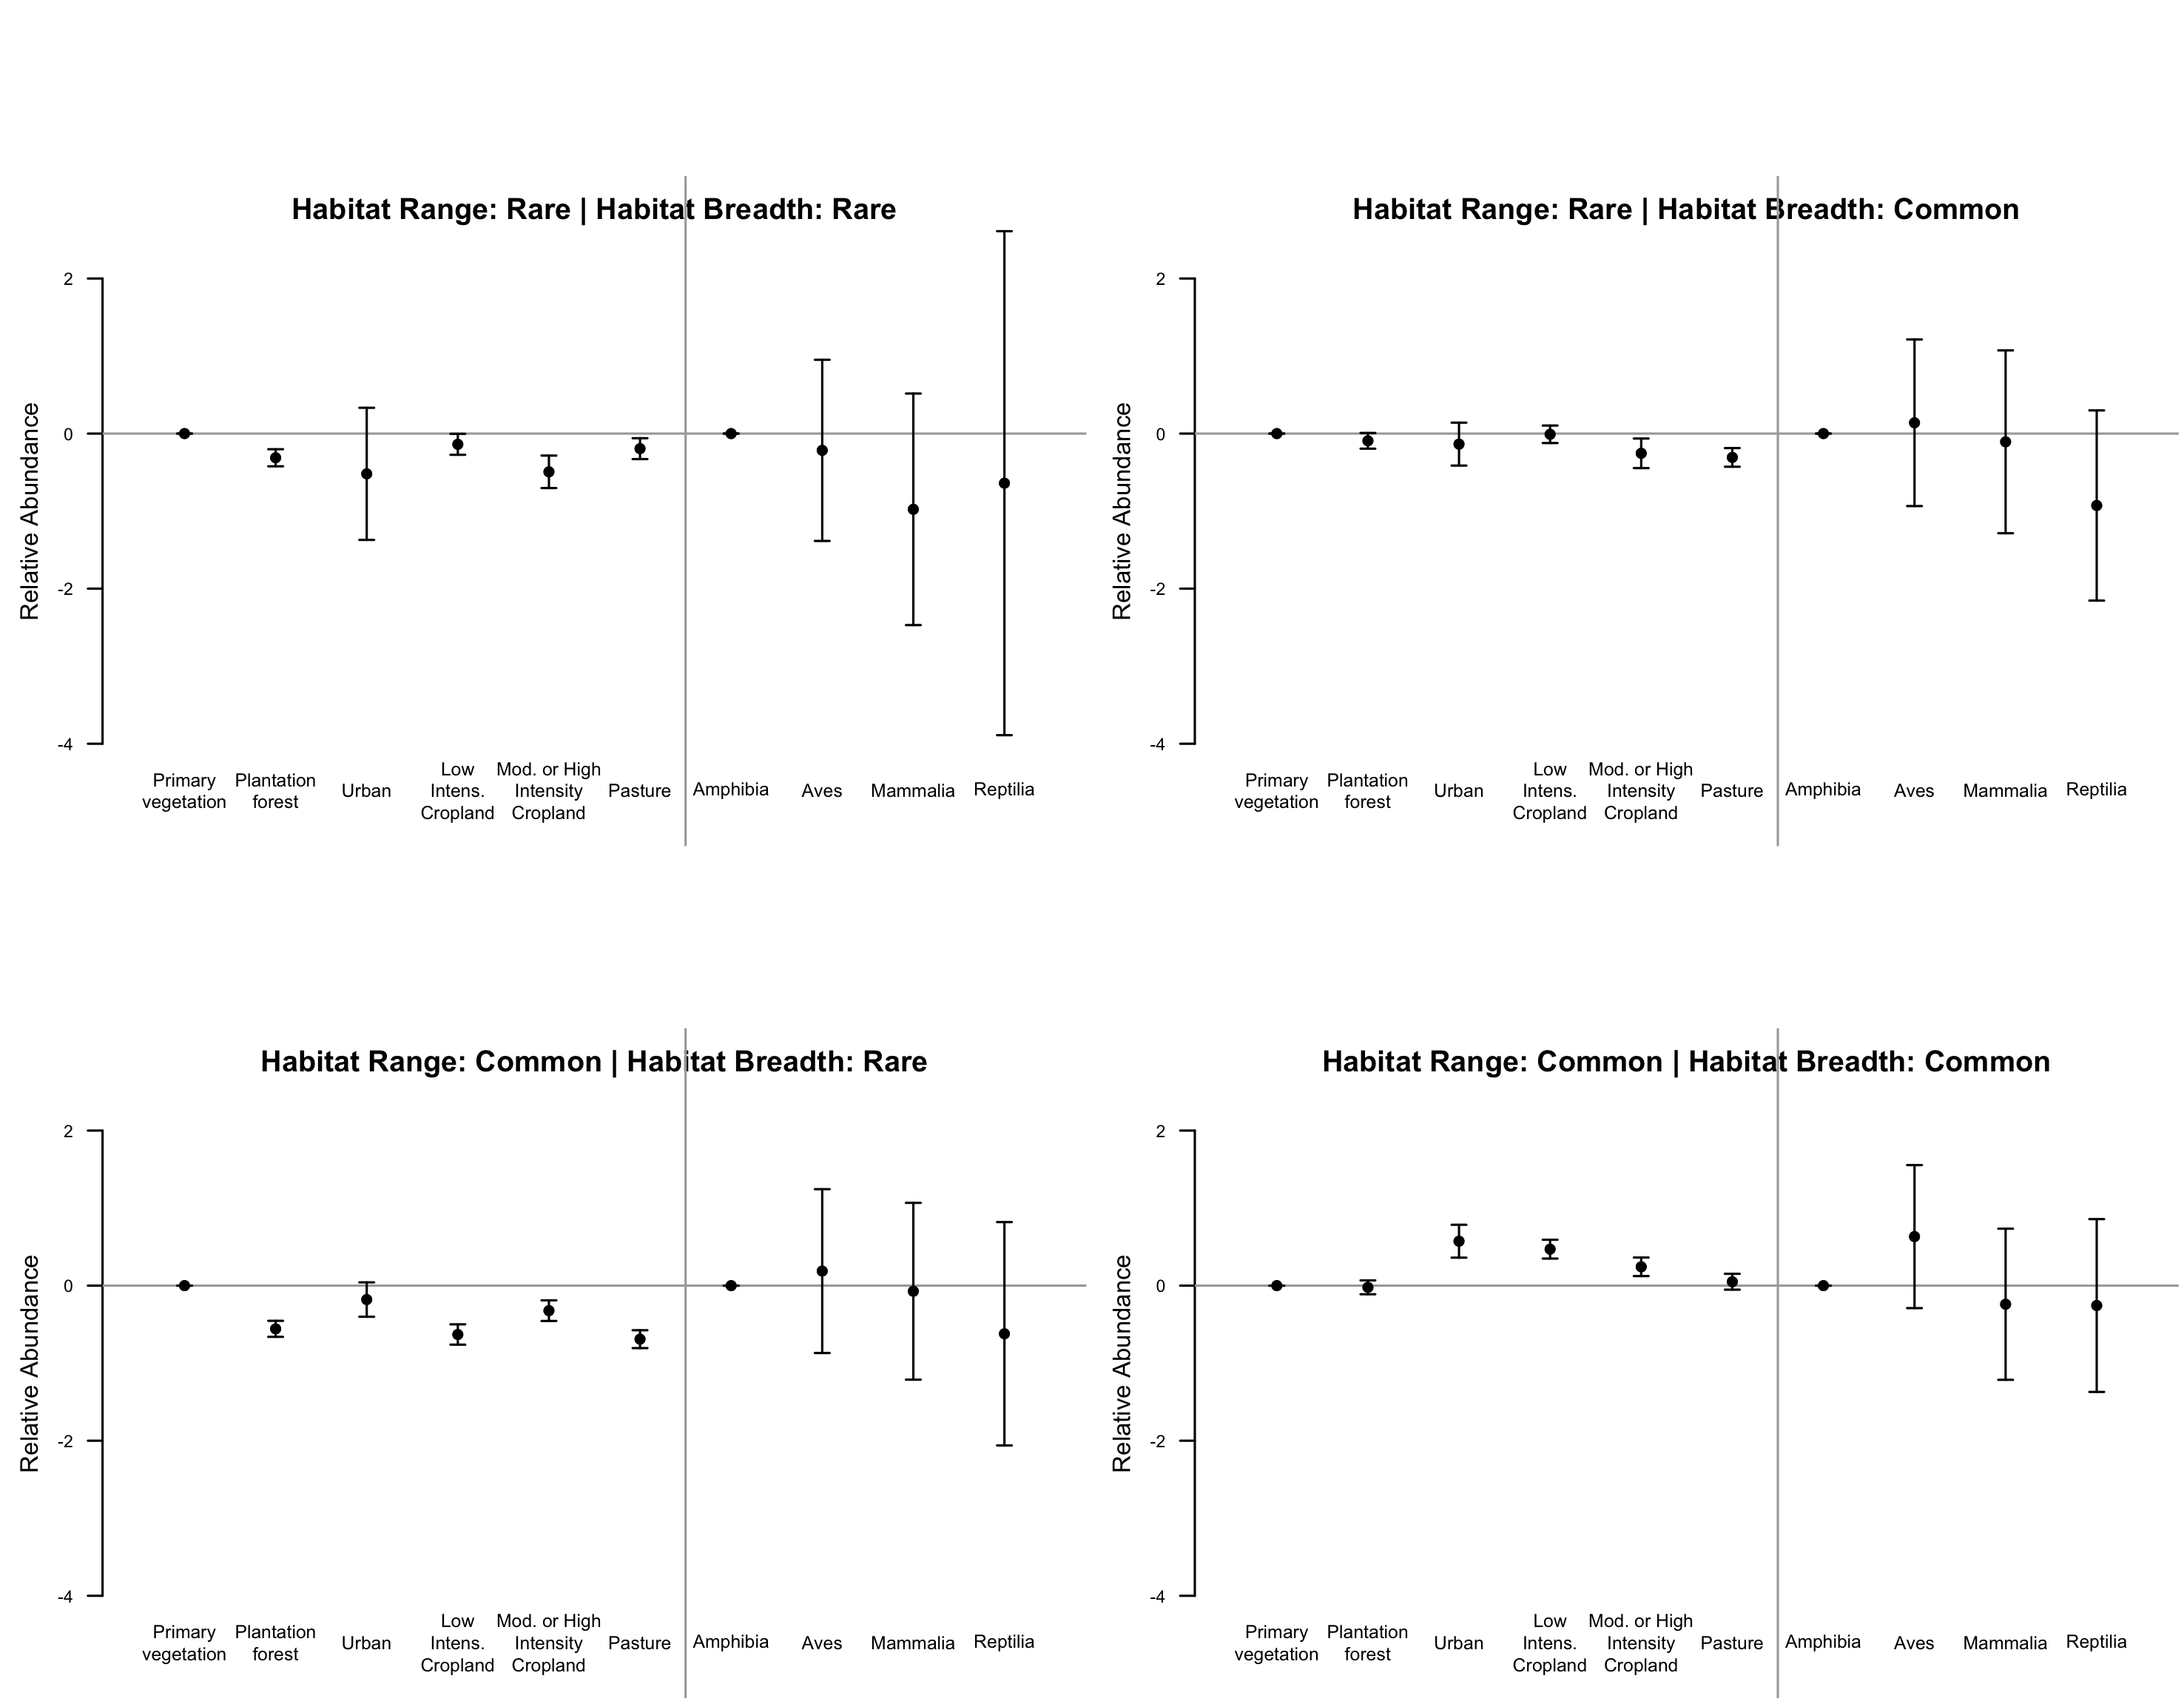


**Supplemental Fig. 7.** Estimates of how the population abundance of species with different rarity combinations varies in different land covers, relative to abundance in primary vegetation. Y axis is plotted on a natural log scale, where a value of 0 corresponds with no change in abundance, a value greater than zero indicates an increase in abundance, and a value less than zero indicates a decrease in abundance.

The output from this step was an estimate of the habitat quality of different land covers in each cell of a species’ habitat range.

When combined with the previous step, this collectively provided two estimates:

- The amount of habitat, in each cell of the species’ habitat range, occupied by different land covers; and
- How this land cover affected the population density of the species, relative to its density in natural land covers.

Both of these were then used to estimate the estimated population abundance in each cell of a species’ habitat range, as discussed in the next sections.

***4. Estimate population density in each cell of a species’ remaining habitat, accounting for both available habitat in that cell and the quality of that habitat:***

Fourth, we estimated a species’ potential population density in each cell of its habitat, accounting for the affect that human-modified land covers have on population density (as from the above section), and how climate characteristics affect a species’ population density across its habitat range. We estimated population density in three steps, described below.

First, we estimated a species’ potential population density in natural land covers, in each cell of the species’ habitat range, accounting for how the climate characteristics in each cell affected a species’ population density. To do this, we extended methodology from Santini et al. (2018)23, which developed mixed effects generalized linear models (GLM) to understand the correlation between field-based observations of population densities and the species’ phylogeny (e.g. order, family, genus), the average body mass of mature adults, and climatic conditions in that location (specifically, net primary productivity, mean annual temperature, annual variance in temperature, annual variation in precipitation, and precipitation in warmest three months of the year). Santini et al (2018)23 used this approach to develop taxa specific GLMs, with separate models for amphibians, birds, mammals, and reptiles. For internal consistency with other parts of this analysis (e.g. species distribution models, etc), we built the GLM models using climate data from the CMIP6 SSP2 RCP4.5 pathway2, rather than the original climate data used in Santini et al (2018)23.

We expanded the approach from Santini et al (2018) in two ways. First, we incorporated total species richness of terrestrial vertebrates into the GLMs because regions with higher species richness typically have lower population density of any given species. In this analysis, we calculated species richness using area of habitat maps for amphibians3, birds4, and mammals5, and IUCN habitat range maps for reptiles6.

For each taxa, we built the GLM ensemble using the ‘dredge()’ function in the MuMIn R package24, which builds models with different combinations of fixed term effects, selects models for inclusion based on an importance threshold (in this case, the smallest number of models that accounted for >99% of predictive power), and then weights the selected models based on their relative AIC. We built separate GLMs for each taxa, because the population densities of different taxa were found to be correlated with different combinations of predictor variables as discussed in Santini et al (2018)23.

Second, we used the taxa-specific GLM ensemble to estimate each species’ population density in each cell of the species’ habitat area, assuming that the entirety of that cell was in primary land cover and a suitable habitat for that species. Because climate variables were covariates in the GLM ensembles, the estimated population density in a species’ habitat varied through space, whilst the estimated population density in a given cell of a species’ habitat varied through time as climatic conditions were projected to change. The coefficients of these GLM models are provided in the Supplemental Data.

When using the GLM ensembles to estimate population densities, we took caution to avoid estimating unrealistically high population densities that were beyond the range of those observed during model development (e.g. as might occur by applying the estimates to species life history traits or to climatic conditions not observed in model development). We did this by assuming the maximum estimated population density for a species could be no more than twice the highest observed population density for that species. If there were no observations for that species in the underlying data, we instead assumed that estimated population density could be no more than double the highest observed population density for the most taxonomically proximate species observed in the dataset (e.g. from the same genus if possible; then from the same family if possible; and then from the same order).

Third, for species that could exist or persist in human modified land covers (i.e. cropland, pastureland, and urban land covers), we accounted for how these land covers affected the quality of habitat for that species, in locations where the species’ habitat and human modified land covers overlapped. To do this, we multiplied the estimates of population density in natural land covers, by the estimated amount of habitat suitable for that species in different human modified land covers, by the quality of these human modified habitats for that species. This step did not affect the habitat area available to a species, but did affect the population density of that species.

The output of this approach was an estimate of a species’ population density in each cell of its habitat range, after accounting for the extent and quality of different land covers in that cell. Because the approach used to estimate population density in natural land covers includes climatic and environmental variables, the estimated population density for a given species will vary in each cell of that species’ habitat range, and will vary through time in a given cell.

***5. Identify habitat patches and populations in the species’ remaining habitat:***

Fifth, we identified the habitat patches and populations in a species’ remaining habitat range. Supplemental Fig. 8provides a visual of habitat patches and populations as defined in this analysis. We did this in two steps:

First, we identified habitat patches, which we defined as as clusters of contiguous cells that contained >20% remaining habitat for that species. We identified habitat patches using the raster::clump() function in R25, using queen’s connectivity (e.g. cells were considered to be touching if they were adjacent or diagonal to each other). The output of this step was the estimated location of different habitat patches in a species’ habitat, and a patch identifier for these patches. All cells in a species’ habitat that contained <20% habitat were not included as part of a habitat patch, but counted towards the species’ total estimated habitat area and population abundance.

Second, we identified populations in the species’ habitat, which we defined as sets of habitat patches that were within a species’ estimated patch dispersal distance. We identified populations using the python libraries skimage, scipy.ndimage, and PIL. We further used taxa-specific approaches to estimate each species’ patch-dispersal capacity, which are described below:

- Amphibians: We drew from Smith et al (2005)26, which is a published review of observed patch dispersal estimates for amphibian species, containing 165 observations across 90 species. We used data from Smith et al (2005) to gap fill to all other amphibians in the analysis, by using taxonomic classifications. Specifically, we assumed that species not included in Smith et al (2005) had a migration distance equivalent to the mean observed distance of other species in the same genus (when data is available), or of species in the same family (when data for genus is not available). For species that were in families and genera not observed in Smith et al (2005), we assumed they have a patch dispersal distance equivalent to the median observed distance of all species in Smith et al (2005), which was 500 meters.
- Birds: We drew from Stewart et al (2022)27, which is a meta-review that collated observations of patch dispersal distances for 330 species of birds. As with amphibians, we gap filled to species not included in Stewart et al (2022), using the same process discussed above. Any remaining species for which we could not estimate patch dispersal distances were assumed to have the median dispersal distance of all other species, which was 14,000 meters.
- Mammals: We drew from Santini et al (2013)28, which developed an approach to estimate patch dispersal distance using a species’ body mass. For species without body mass data, we estimated body mass data using the same approach as discussed above for amphibians and birds (e.g. drawing from species in the same genus, family, or order). For mammalian species for which we could not estimate dispersal distances (i.e. we did not have body mass data for that species or any similar species), and that were not in the same genera, family, or order as any species for which we could estimate dispersal distances, we assumed these species have a patch dispersal distance equivalent to the median distance across all other species in the analysis, which was 255 meters.
- Reptiles: We drew from Southwood and Avans (2010)29, which is a review of patch dispersal distances for reptiles. This review found that most species of reptiles do not disperse from their home habitats, and so in the context of this analysis have a patch dispersal distance of 0. The exception to this was that species in the genus *Iguana* (up to 3km), *Crocodylus* (up to 10km), *Conolophus* (up to 10km), *Liasis* (up to 12km), and *Thamnophis* (up to 17km) have dispersal distances as indicated in the review.

The estimates of patch-dispersal distance in this analysis assumed there were no barriers to patch dispersal and so therefore might be an upper limit of potential patch dispersal distance. This contrasts to how a road, river, or other obstacle might limit or entirely prevent a species from dispersing between patches. Supplemental Table 4 contains summary results on the change in the number of habitat patches and populations in a species’ habitat range under different assumptions of a species’ patch dispersal distance and when a species’ habitat is identified using the ‘prevalence’ and ‘equal specificity and sensitivity’ thresholds.

**Supplemental Fig. 8.** A visual example of habitat patches and populations in Glob2Loc. Colours indicate different habitat patches (left panel) or populations for (middle panel, right panel). Light shades in middle panel and right panel indicate the species’ estimated patch dispersal distance, for a species with low dispersal (middle panel) or high dispersal distance (right panel). Arrows indicate connectivity between non-adjacent habitat patches that form populations.

**Supplemental Table 4.** Change in the number of habitat patches and populations under different assumptions in a species’ patch dispersal distances and under different ways of identifying a species’ project climate accessible habitat range (indicated in column ‘SDM Threshold’). Values indicate proportional changes in the number of habitat patches and populations relative to baseline in 2020.

**Reporting Biodiversity Outcomes:**

The final part of Glob2Loc was to report biodiversity outcomes at several scales of space and biodiversity used in biodiversity policy and conservation decision-making. These outcomes were reported for every 5-year interval from 2020 to 2050, with the scales of space and biodiversity listed below:

*Scales of Biodiversity:*

- Habitat patches (Extended Data 1, 3, 4):
  - The geographic area and population abundance of the largest patch.
  - The number of patches that had an area or population abundance larger than the threshold set in IUCN Red List Criteria for fragmentation30.
  - The number of patches needed to exceed 50%, 75%, 90%, and 95% of habitat area and population abundance.
- Populations (Extended Data 2):
  - The area and population abundance of the largest population.
  - The number of populations that had an area or population abundance larger than the threshold set in IUCN Red List Criteria for fragmentation30.
  - The number of populations needed to exceed 50%, 75%, 90%, and 95% of habitat area and population abundance, are available in Extended Data Tables 1-4.
- Species (Extended Data 1-4):
  - Change in number of habitat patches and populations
  - Change
  - Change in geographic area
  - Change in population abundance (Extended Data 1-4)
- Genera:
  - Mean, median, and variance in change for species in different general, families, and orders.

*Scales of Space:*

- Individual cells, as shown in Figures 4-5 in the main text.
- Landscapes, as defined by biodiversity hotspots and ecoregions, as shown in Figures 2-4 in the main text. Extended Data Table 1 contains summary statistics for species found in each ecoregion. Extended Data Table 2 contains summary statistics for species found in different biodiversity hotspots31.
- Countries, with Extended Data Table 3 containing summary statistics for species found in each country.

**Description of Supplementary Data and Extended Data Tables:**

Supplementary Data 1: Folder containing species-level results for the baseline scenario, when assuming species are not able to disperse between non-adjacent habitat patches. Data in the folder includes results for both the ‘prevalence’ and ‘equal specificity and sensitivity thresholds’ thresholds. Folder contains files corresponding with absolute outcomes (e.g. total estimated habitat area, total population abundance, total number of patches) and proportional outcomes (e.g. proportional change in estimated habitat area from 2020-2050, etc). Results in this folder assume that a species’ capacity to access new climate-suitable habitat is limited by their climate migration rates.

Supplementary Data 2: Contains species-level results for the baseline scenario, when assuming species are able to disperse between non-adjacent habitat patches. Data in the folder includes results for both the ‘prevalence’ and ‘equal specificity and sensitivity thresholds’ thresholds. Folder contains files corresponding with absolute outcomes (e.g. total estimated habitat area, total population abundance, total number of patches) and proportional outcomes (e.g. proportional change in estimated habitat area from 2020-2050, etc). Results in this folder assume that a species’ capacity to access new climate-suitable habitat is limited by their climate migration rates.

Supplementary Data 3: Folder containing species-level results for the baseline scenario, but when assuming a species’ capacity to access new climate-suitable habitat is not limited by their climate migration rates. Data in the folder includes results for both the ‘prevalence’ and ‘equal specificity and sensitivity thresholds’ thresholds. Results in this folder assume no dispersal between habitat patches. Folder contains absolute outcomes (e.g. total estimated habitat area, total population abundance, total number of patches) and proportional outcomes (e.g. proportional change in estimated habitat area from 2020-2050, etc).

Supplementary Data 4: Contains species-level results for the mitigation scenario, when assuming species are not able to disperse between habitat patches. Results are limited to species that are currently endemic to a biodiversity hotspot. Data file includes outcomes for both the ‘prevalence’ and ‘equal specificity and sensitivity thresholds’ thresholds. Files in the folder contain both absolute outcomes (e.g. total estimated habitat area, total population abundance, total number of patches) and proportional outcomes (e.g. proportional change in estimated habitat area from 2020-2050, etc). Results in this folder assume that a species’ capacity to access new climate-suitable habitat is limited by their climate migration rates.

Extended Data Table 1: Summary statistics indicating biodiversity outcomes for each ecoregion. Species are included in the summary for an ecoregion if >=25% of the species current habitat is in the ecoregion.

Extended Data Table 2: Summary statistics indicating biodiversity outcomes for each biodiversity hotspot. Species are included in the summary for an ecoregion if >=25% of the species current habitat is in the ecoregion.

Extended Data Table 3: Summary statistics indicating biodiversity outcomes for each country. Species are included in the summary for an ecoregion if >=25% of the species current habitat is in the ecoregion.

**Supplemental Country-Level Analyses:**

The case study countries included in the Extended Data Fig. 1 are Australia, Ecuador, Ghana, Japan, Sweden, Tanzania, and Uzbekistan. These case study countries were selected because they vary across realms, biomes, continents, and responses to different anthropogenic stressors.

**Software:**

All analyses were conducted in either R 4.2.2-foss-2022a-ARC or in Python 3. Python 3 was used to estimate dispersal distances and connectivity between habitat patches. All other analyses were conducted in R. R 4.2.2-foss-2022a-ARC is a version of R that runs on Oxford’s computing cluster. All scripts used in the analysis are available through the project GitHub at <https://github.com/michaelaclark19/Glob2Loc/>. The GitHub contains a Read Me file indicating the order in which to run the scripts.

**Supplementary References:**

1. Newbold, T. Future effects of climate and land-use change on terrestrial vertebrate community diversity under different scenarios. *Proceedings of the Royal Society B: Biological Sciences* 285, (2018).

2. Eyring, V. *et al.* Overview of the Coupled Model Intercomparison Project Phase 6 (CMIP6) experimental design and organization. *Geosci. Model Dev.* 9, 1937–1958 (2016).

3. Ficetola, G. F., Rondinini, C., Bonardi, A., Baisero, D. & Padoa-Schioppa, E. Habitat availability for amphibians and extinction threat: A global analysis. *Divers. Distrib.* 21, 302–311 (2015).

4. Beresford, A. E. *et al.* Poor overlap between the distribution of Protected Areas and globally threatened birds in Africa. *Anim. Conserv.* 14, 99–107 (2011).

5. Rondinini, C. *et al.* Global habitat suitability models of terrestrial mammals. *Philosophical Transactions of the Royal Society B: Biological Sciences* 366, 2633–2641 (2011).

6. IUCN. The IUCN Red List of Threatened Species. (2025).

7. WWF. Terrestrial Ecoregions of the World. (2012).

8. Hijmans, R., Phillips, S., Leathwick, J. & Elith, J. dismo: Species Distribution Modeling. (2024).

9. Williams, D. R. *et al.* Proactive conservation to prevent habitat losses to agricultural expansion. *Nat. Sustain.* 4, 314–322 (2021).

10. Kehoe, L. *et al.* Biodiversity at risk under future cropland expansion and intensification. *Nat. Ecol. Evol.* 1, 1129–1135 (2017).

11. Huang, K., Li, X., Liu, X. & Seto, K. C. Projecting global urban land expansion and heat island intensification through 2050. *Environmental Research Letters* 14, 1–12 (2019).

12. European Space Agency. Land Cover CCI Product User Guide Version 2 Technical Report. (2017).

13. Willett, W. *et al.* Food in the Anthropocene: the EAT–Lancet Commission on healthy diets from sustainable food systems. *The Lancet* vol. 393 447–492 (2019).

14. Springmann, M. *et al.* Options for keeping the food system within environmental limits. *Nature* 562, 519–525 (2018).

15. Food and Agricultural Organization & IIASA. FAO Global Agro-Ecological Zones. (2025).

16. Weiss, D. J. *et al.* A global map of travel time to cities to assess inequalities in accessibility in 2015. *Nature* 553, 333–336 (2018).

17. UNEP-WCMC & IUCN. Protected Planet: The World Database on Protected Areas (WDPA). (2025).

18. Title, P. O. & Bemmels, J. B. ENVIREM: An expanded set of bioclimatic and topographic variables increases flexibility and improves performance of ecological niche modelling. *Ecography* 41, 291–307 (2018).

19. Dietrich, J. P. *et al.* Measuring agricultural land-use intensity - A global analysis using a model-assisted approach. *Ecol. Modell.* 232, 109–118 (2012).

20. Sykes, L., Santini, L., Etard, A. & Newbold, T. Effects of rarity form on species’ responses to land use. *Conservation Biology* 34, 688–696 (2020).

21. Phalan, B., Onial, M., Balmford, A. & Green, R. E. Reconciling food production and biodiversity conservation: Land sharing and land sparing compared. *Science (1979).* 333, 1289–1291 (2011).

22. Hudson, L. N. *et al.* The PREDICTS database: A global database of how local terrestrial biodiversity responds to human impacts. *Ecol. Evol.* 4, 4701–4735 (2014).

23. Santini, L. *et al.* Global drivers of population density in terrestrial vertebrates. *Global Ecology and Biogeography* 27, 968–979 (2018).

24. Barto, K. MuMIn: Multi-Model Inference. (2025).

25. Hijmans, R. Geographic Data Analysis and Modeling. (2025).

26. Smith, M. A. & Green, D. M. Dispersal and the metapopulation paradigm in amphibian ecology and conservation: Are all amphibian populations metapopulations? *Ecography* 28, 110–128 (2005).

27. Stewart, P. S. *et al.* Global impacts of climate change on avian functional diversity. *Ecol. Lett.* 25, 673–685 (2022).

28. Santini, L. *et al.* Ecological correlates of dispersal distance in terrestrial mammals. *Hystrix* 24, 181–186 (2013).

29. Southwood, A. & Avens, L. Physiological, behavioral, and ecological aspects of migration in reptiles. *J. Comp. Physiol. B* 180, 1–23 (2010).

30. *IUCN RED LIST CATEGORIES AND CRITERIA Version 3.1*. https://portals.iucn.org/library/sites/library/files/documents/RL-2001-001-2nd.pdf (2012).

31. Myers, N., Mittermeier, R. A., Mittermeier, C. G., Da Fonseca, G. A. B. & Kent, J. Biodiversity hotspots for conservation priorities. *Nature* 403, 853–58 (2000).
